# Supplementary material
Source: PubMed Central journal article supplement (PMC10141278)
Supplement: jamaophthalmol-e230937-s001.pdf [file jamaophthalmol-e230937-s001.pdf]

## Supplementary Online Content

Bao YK, Xu BY, Friedman DS, et al. Biometric risk factors for angle closure progression after laser peripheral iridotomy. *JAMA Ophthalmol*. Published online April 27, 2023.  
doi:10.1001/jamaophthalmol.2023.0937

**eFigure.** Representative AS-OCT Image With AS-OCT Measurements Labeled

This supplementary material has been provided by the authors to give readers additional information about their work.

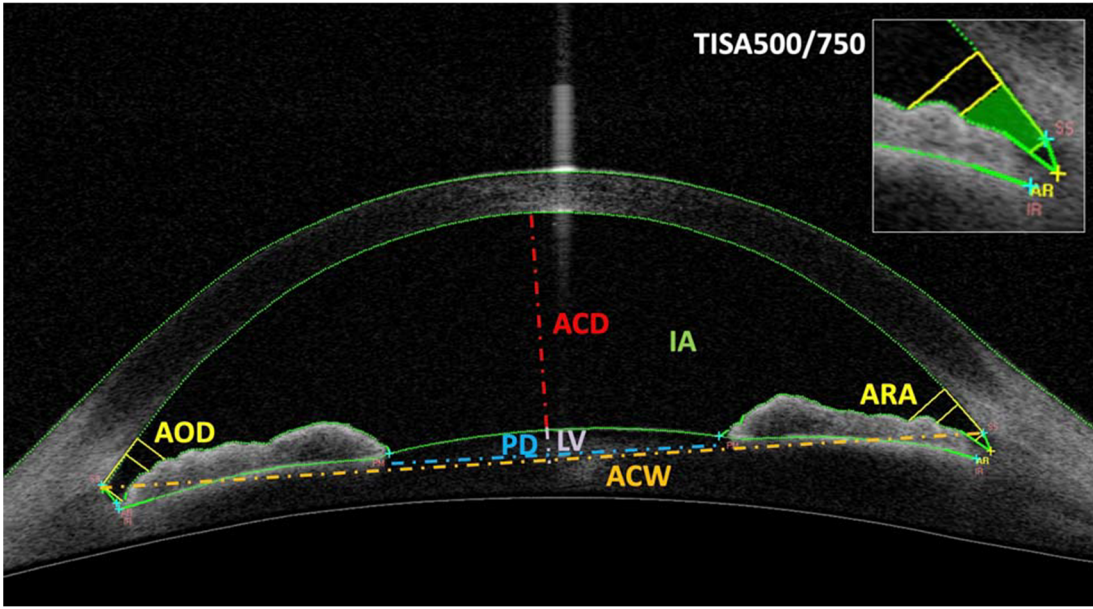

**eFigure.** Representative AS-OCT Image With AS-OCT Measurements Labeled
