# Supplementary material
Source: PubMed Central journal article supplement (PMC10141278)
Supplement: jamaophthalmol-e230937-s002.pdf [file jamaophthalmol-e230937-s002.pdf]

## Data Sharing Statement

Bao YK, Xu BY, Friedman DS, et al. Biometric risk factors for angle closure progression after laser peripheral iridotomy. *JAMA Ophthalmol*. Published online April 27, 2023.

doi:10.1001/jamaophthalmol.2023.0937

### Data

**Data available:** Yes

**Data types:** Deidentified participant data, Data dictionary

**How to access data:** [mingguang.he@unimelb.edu.au](mailto:mingguang.he@unimelb.edu.au)

**When available:** With publication

### Supporting Documents

**Document types:** None

### Additional Information

**Who can access the data:** anyone requesting the data

**Types of analyses:** academic research

**Mechanisms of data availability:** after approval of proposal
